# Supplementary material
Source: PubMed Central journal article supplement (PMC6994206)
Supplement: NIHMS1067216-supplement-1.pdf [file NIHMS1067216-supplement-1.pdf]

A

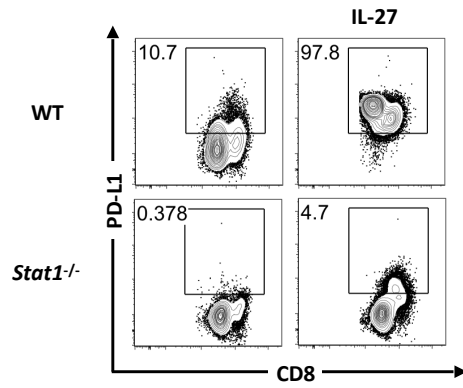

B

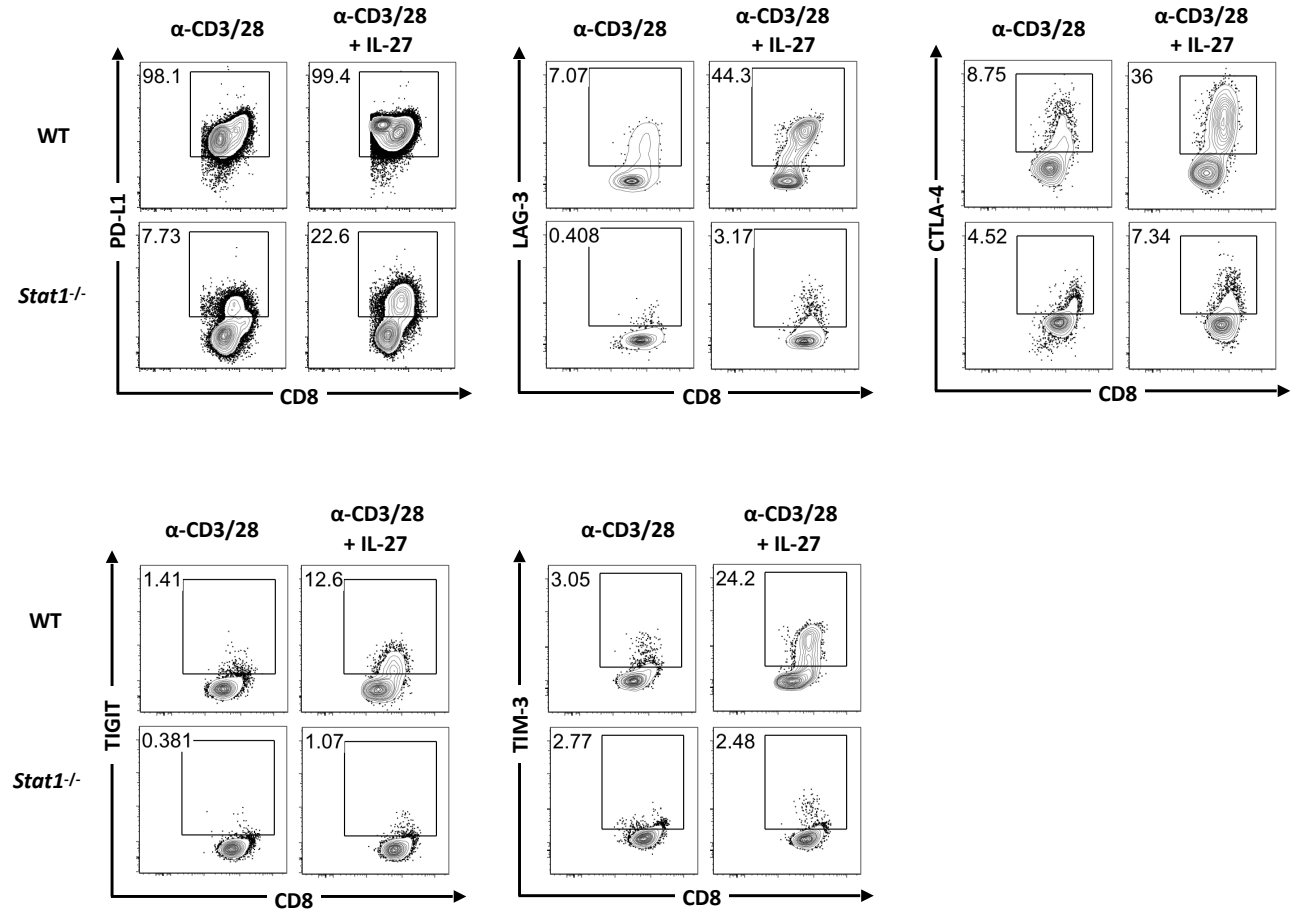

**Supp Fig 2. STAT1 contributes to IL-27-mediated inhibitory receptor expression *in vitro*.** Requirement for STAT1 for cytokine-mediated inhibitory receptor expression in sorted naive Ly6C<sup>-</sup> Sca-1<sup>-</sup> CD8<sup>+</sup> T cells. A. Cells cultured in the absence of anti-CD3/CD28 stimulation. B. Cells cultured in the presence of anti-CD3/CD28 stimulation. Results representative of 3 independent experiments.
