# Supplementary material
Source: PubMed Central journal article supplement (PMC6994206)
Supplement: NIHMS1067216-supplement-Figures.pdf [file NIHMS1067216-supplement-Figures.pdf]

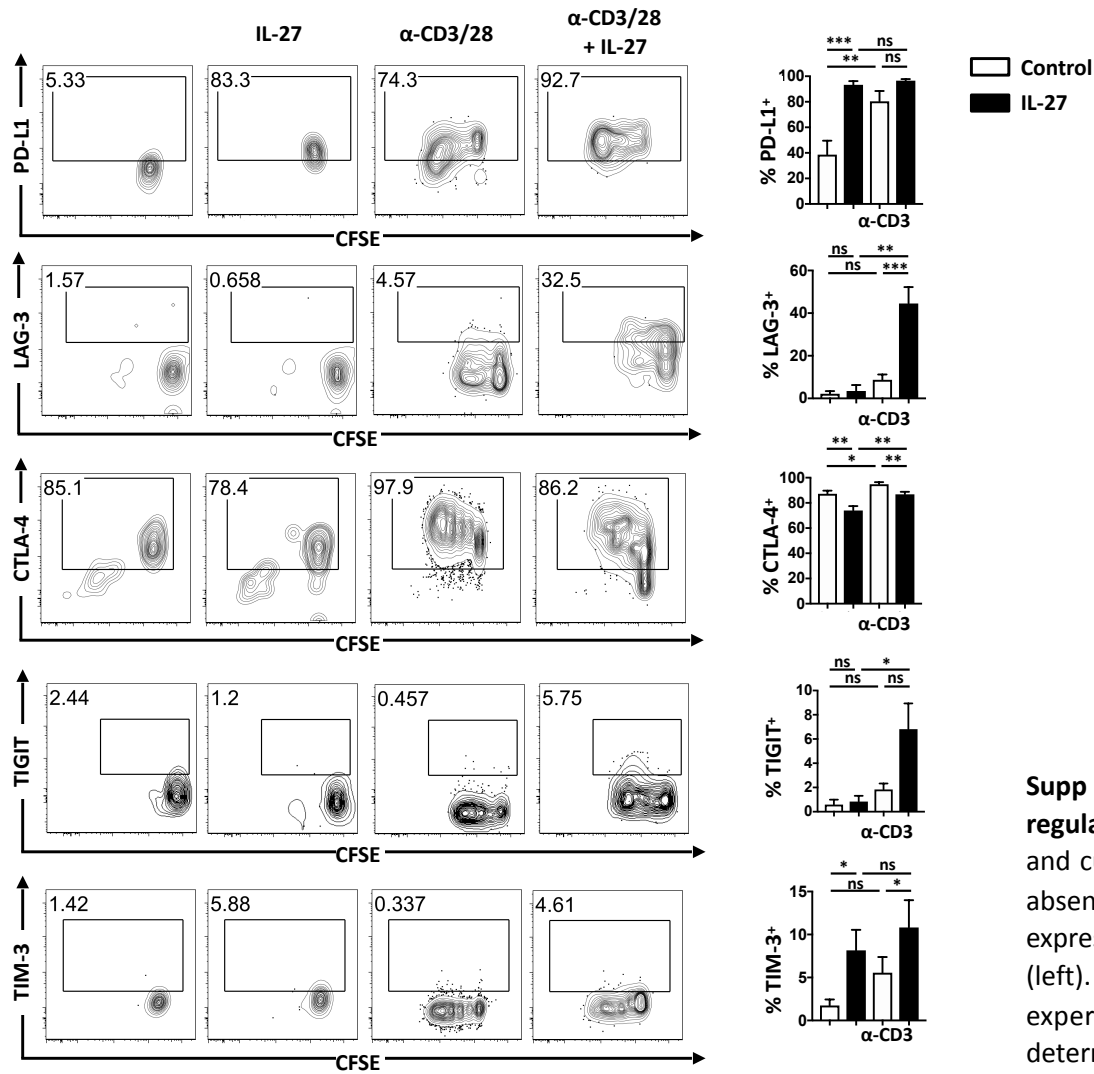

**Supp Fig 1. IL-27 induces expression of multiple inhibitory receptors by regulatory T cells.** Naïve, Ly6C-Sca-1<sup>-</sup> CD4<sup>+</sup> and T cells were sort purified and cultured in the presence or absence of α-CD3/28, in the presence or absence of IL-27. After an 85-hour culture, cells were analyzed for expression of PD-L1, PD-1, LAG-3, and CTLA-4. Representative FACS plots (left). Bar charts (right) show combined results from 4 independent experiments. Error bars indicate SEM. Statistical significance was determined by using Student's t test. ns p > 0.05, \* p < 0.05, \*\* p < 0.01, \*\*\* p < 0.001

A

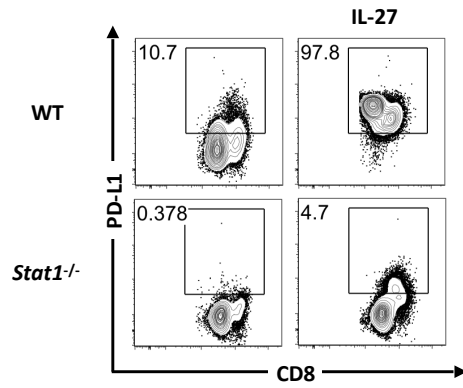

B

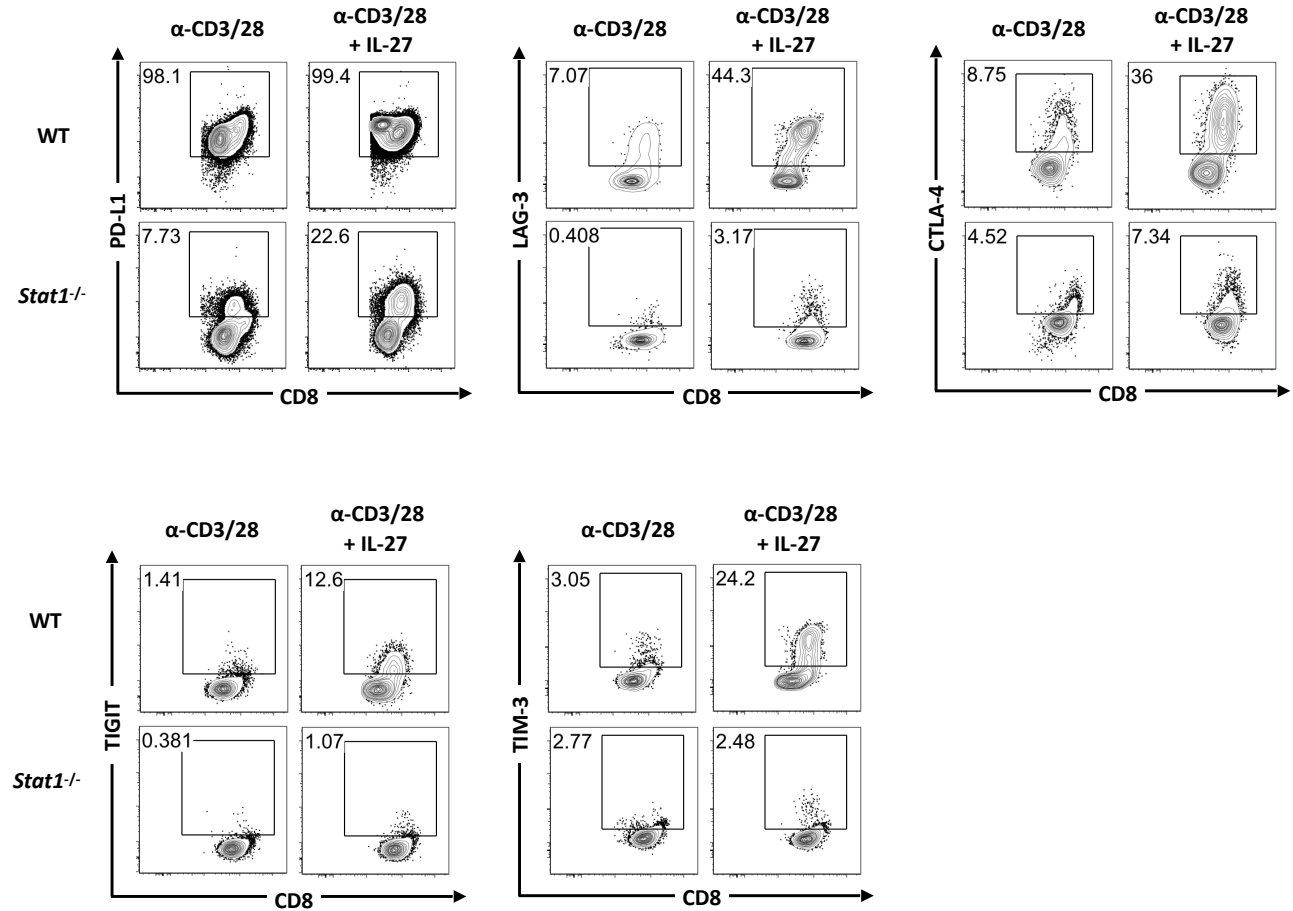

**Supp Fig 2. STAT1 contributes to IL-27-mediated inhibitory receptor expression *in vitro*.** Requirement for STAT1 for cytokine-mediated inhibitory receptor expression in sorted naive Ly6C<sup>-</sup> Sca-1<sup>-</sup> CD8<sup>+</sup> T cells. A. Cells cultured in the absence of anti-CD3/CD28 stimulation. B. Cells cultured in the presence of anti-CD3/CD28 stimulation. Results representative of 3 independent experiments.

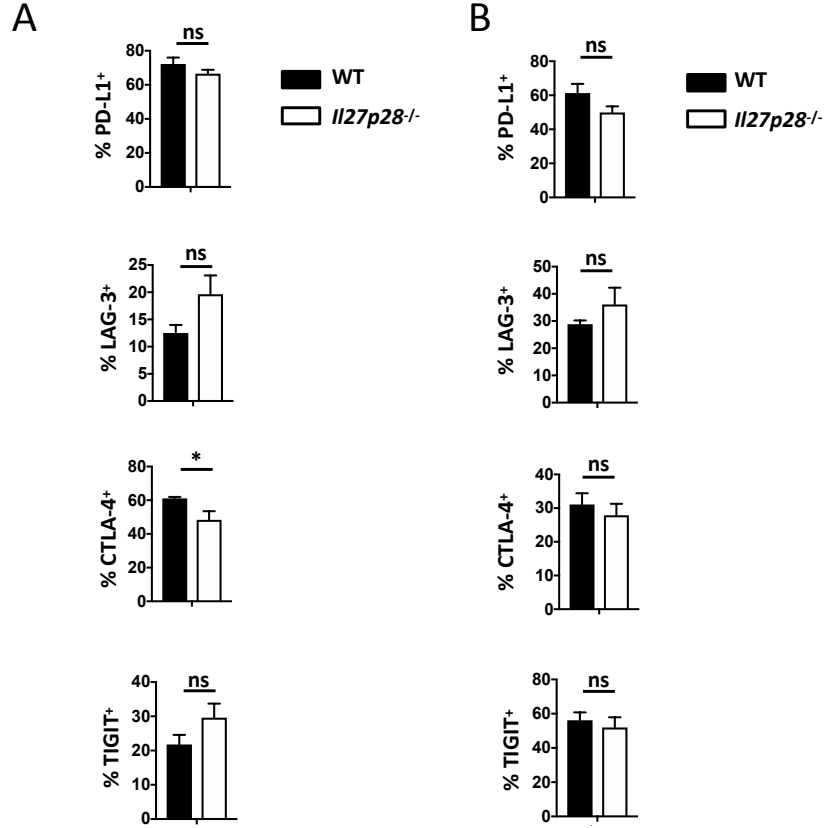

**Supp Fig 3. IL-27 not required for splenic inhibitory receptor expression during toxoplasmosis. A-B.** WT and *Il27p28*<sup>-/-</sup> mice were infected with 20 Me49 cysts i.p. for 11-12 days. Inhibitory receptor expression by WT and *Il27p28*<sup>-/-</sup> splenic tetramer<sup>+</sup> CD4<sup>+</sup> (A) and CD8<sup>+</sup> (B) T cells. 4-5 mice per group, data representative of four independent experiments. Error bars indicate SEM.
